# Supplementary material
Source: HighWire-hosted journal article supplement (https://erj.ersjournals.com/content/58/6/2004196)
Supplement: inline-supplementary-material-2 [file inline-supplementary-material-2.pdf]

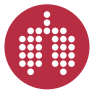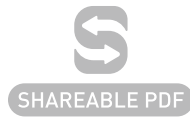

# Role of angiotensin-2 in venous thrombus resolution and chronic thromboembolic disease

Lukas Hobohm <sup>1,2</sup>, Sebastian Kölmel<sup>3</sup>, Caroline Niemann<sup>4</sup>, Philipp Kümpers<sup>5</sup>, Valentin J. Krieg<sup>6</sup>, Magdalena L. Bochenek<sup>1,2,7</sup>, Alexander H. Lukasz<sup>5</sup>, Yvonne Reiss<sup>7,8</sup>, Karl-Heinz Plate<sup>7,8</sup>, Christoph Liebetrau<sup>7,9,10</sup>, Christoph B. Wiedenroth<sup>11</sup>, Stefan Guth <sup>11</sup>, Thomas Münzel<sup>2,7</sup>, Gerd Hasenfuß <sup>12,13</sup>, Philip Wenzel<sup>1,2,7</sup>, Eckhard Mayer<sup>11</sup>, Stavros V. Konstantinides <sup>1,14</sup>, Katrin Schäfer<sup>2,7</sup> and Mareike Lankeit <sup>1,12,15,16</sup>

<sup>1</sup>Center for Thrombosis and Hemostasis (CTH), University Medical Center, Mainz, Germany. <sup>2</sup>Dept of Cardiology, Cardiology I, University Medical Center, Mainz, Germany. <sup>3</sup>Internal Medicine and Endocrinology/Diabetes, Kantonsspital St Gallen, Sankt Gallen, Switzerland. <sup>4</sup>Clinic of Gynaecology, St Franziskus Hospital Münster, Münster, Germany. <sup>5</sup>Dept of Medicine D, Division of General Internal Medicine, Nephrology and Rheumatology, University Hospital Münster, Münster, Germany. <sup>6</sup>Division of Cardiology, Pulmonology, and Vascular Medicine, Medical Faculty, Heinrich-Heine University, Düsseldorf, Germany. <sup>7</sup>German Cardiovascular Research Centre, partner site Rhine-Main, Mainz, Germany. <sup>8</sup>Institute of Neurology (Edinger Institute), University Hospital, Goethe University, Frankfurt, Germany. <sup>9</sup>Dept of Cardiology, Kerckhoff Clinic, Bad Nauheim, Germany. <sup>10</sup>Dept of Cardiology, Justus-Liebig University of Giessen, Giessen, Germany. <sup>11</sup>Dept of Thoracic Surgery, Kerckhoff Clinic, Bad Nauheim, Germany. <sup>12</sup>Clinic of Cardiology and Pneumology, Heart Center, University Medical Center Göttingen, Göttingen, Germany. <sup>13</sup>German Cardiovascular Research Centre, partner site Göttingen, Göttingen, Germany. <sup>14</sup>Dept of Cardiology, Democritus University of Thrace, Alexandroupolis, Greece. <sup>15</sup>Dept of Internal Medicine and Cardiology, Campus Virchow Klinikum, Charité – University Medicine, Berlin, Germany. <sup>16</sup>German Cardiovascular Research Centre, partner site Berlin, Berlin, Germany.

Corresponding author: Mareike Lankeit ([mareike.lankeit@uni-mainz.de](mailto:mareike.lankeit@uni-mainz.de))

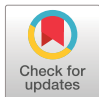

Shareable abstract (@ERSpublications)

These findings in patients and mouse models reveal a new role for angiotensin-2 in the pathophysiology of CTEPH, suggesting that its overexpression in pulmonary endothelium may contribute to defective angiogenesis and persistent vascular occlusion <https://bit.ly/3gotczC>

**Cite this article as:** Hobohm L, Kölmel S, Niemann C, *et al.* Role of angiotensin-2 in venous thrombus resolution and chronic thromboembolic disease. *Eur Respir J* 2021; 58: 2004196 [DOI: 10.1183/13993003.04196-2020].

This single-page version can be shared freely online.

## Abstract

**Background** Defective angiogenesis, incomplete thrombus revascularisation and fibrosis are considered critical pathomechanisms of chronic thromboembolic pulmonary hypertension (CTEPH) after pulmonary embolism. Angiotensin-2 (ANGPT2) has been shown to regulate angiogenesis, but its importance for thrombus resolution and remodelling is unknown.

**Methods** ANGPT2 plasma concentrations were measured in patients with CTEPH (n=68) and acute pulmonary embolism (n=84). Tissue removed during pulmonary endarterectomy (PEA) for CTEPH was analysed (immuno)histologically. A mouse model of inferior vena cava ligation was used to study the kinetics of venous thrombus resolution in wild-type mice receiving recombinant ANGPT2 *via* osmotic pumps, and in transgenic mice overexpressing ANGPT2 in endothelial cells.

**Results** Circulating ANGPT2 levels were higher in CTEPH patients compared to patients with idiopathic pulmonary arterial hypertension and healthy controls, and decreased after PEA. Plasma ANGPT2 levels were elevated in patients with pulmonary embolism and diagnosis of CTEPH during follow-up. Histological analysis of PEA specimens confirmed increased ANGPT2 expression, and low levels of phosphorylated TIE2 were observed in regions with early-organised pulmonary thrombi, myofibroblasts and fibrosis. Microarray and high-resolution microscopy analysis could localise ANGPT2 overexpression to endothelial cells, and hypoxia and transforming growth factor- $\beta$ 1 were identified as potential stimuli. Gain-of-function experiments in mice demonstrated that exogenous ANGPT2 administration and transgenic endothelial ANGPT2 overexpression resulted in delayed venous thrombus resolution, and thrombi were characterised by lower TIE2 phosphorylation and fewer microvessels.

Copyright ©The authors 2021. For reproduction rights and permissions contact [permissions@ersnet.org](mailto:permissions@ersnet.org)

This article has supplementary material available from [erj.ersjournals.com](http://erj.ersjournals.com)

Received: 14 Nov 2020  
Accepted: 10 April 2021

**Conclusion** Our findings suggest that ANGPT2 delays venous thrombus resolution and that overexpression of ANGPT2 contributes to thrombofibrosis and may thus support the transition from pulmonary embolism to CTEPH.
